# Supplementary material for: Molecular cloning and expression analysis of three ThERFs involved in the response to waterlogging stress of Taxodium ‘Zhongshanshan406’, and subcellular localization of the gene products
Source: PeerJ. 2018 Mar 12;6:e4434. doi: 10.7717/peerj.4434 (PMC5853676; doi:10.7717/peerj.4434)
Supplement: Supplemental Information 2 [file peerj-06-4434-s002.xlsx]

## Sheet: Sheet1
ERF15root	1	3	5	7	9		leave	1	3	5	7	9
HF	1.2507	0.9123	0.838	9.0787	2.9845			0.2731	1.9373	0.6079	2.5981	0.0718
TS	1.6711	0.1308	0.839	18.3051	18.5971			0.281	0.4373	0.9856	1.2021	0.0532
ERF39	1	3	5	7	9		leave	1	3	5	7	9
HF	0.8071	0.5345	0.9203	0.2631	5.5034			0.8351	0.7171	0.4924	1.4815	3.0745
TS	0.8995	0.103	0.6966	1.8166	3.9856			0.4617	0.1822	2.3041	3.2339	13.9776
	1	3	5	7	9			1	3	5	7	9
RAP2.3root							leave
HF	0.3552	1.035	0.089	0.147	0.3123			3.5944	3.4578	0.2925	0.1597	0.1446
TS	0.7543	0.5375	0.281	3.2805	4.88			2.5715	3.7535	1.8897	14.8366	12.8649
ERF15root	1	3	5	7	9		leave	1	3	5	7	9
HF	0.3761	0.2319	0.4569	2.0681	0.1793			0.0692	0.4022	0.3555	0.6474	0.0268
TS	0.6097	0.0111	0.2561	7.9865	2.9482			0.0512	0.1254	0.285	0.24	0.0315
ERF39root	1	3	5	7	9		leave	1	3	5	7	9
HF	0.3921	0.0953	0.1478	0.2553	3.3206			0.1027	0.0951	0.0387	0.564	0.6703
TS	0.2964	0.0471	0.3521	0.5004	1.8474			0.0871	0.0622	0.3574	0.359	3.4445
	1	3	5	7	9			1	3	5	7	9
RAP2.3root							leave
HF	0.1286	0.335	0.0112	0.0468	0.0447			0.6141	0.5278	0.0917	0.048	0.446
TS	0.095	0.156	0.0467	0.7111	0.5114			0.8749	0.632	0.5428	2.0578	2.5877
